# Supplementary material
Source: publisher site journal article supplement (https://www.dovepress.com/article/486371)
Supplement: Supplementary file 1 [file get_supplementary_file.php]

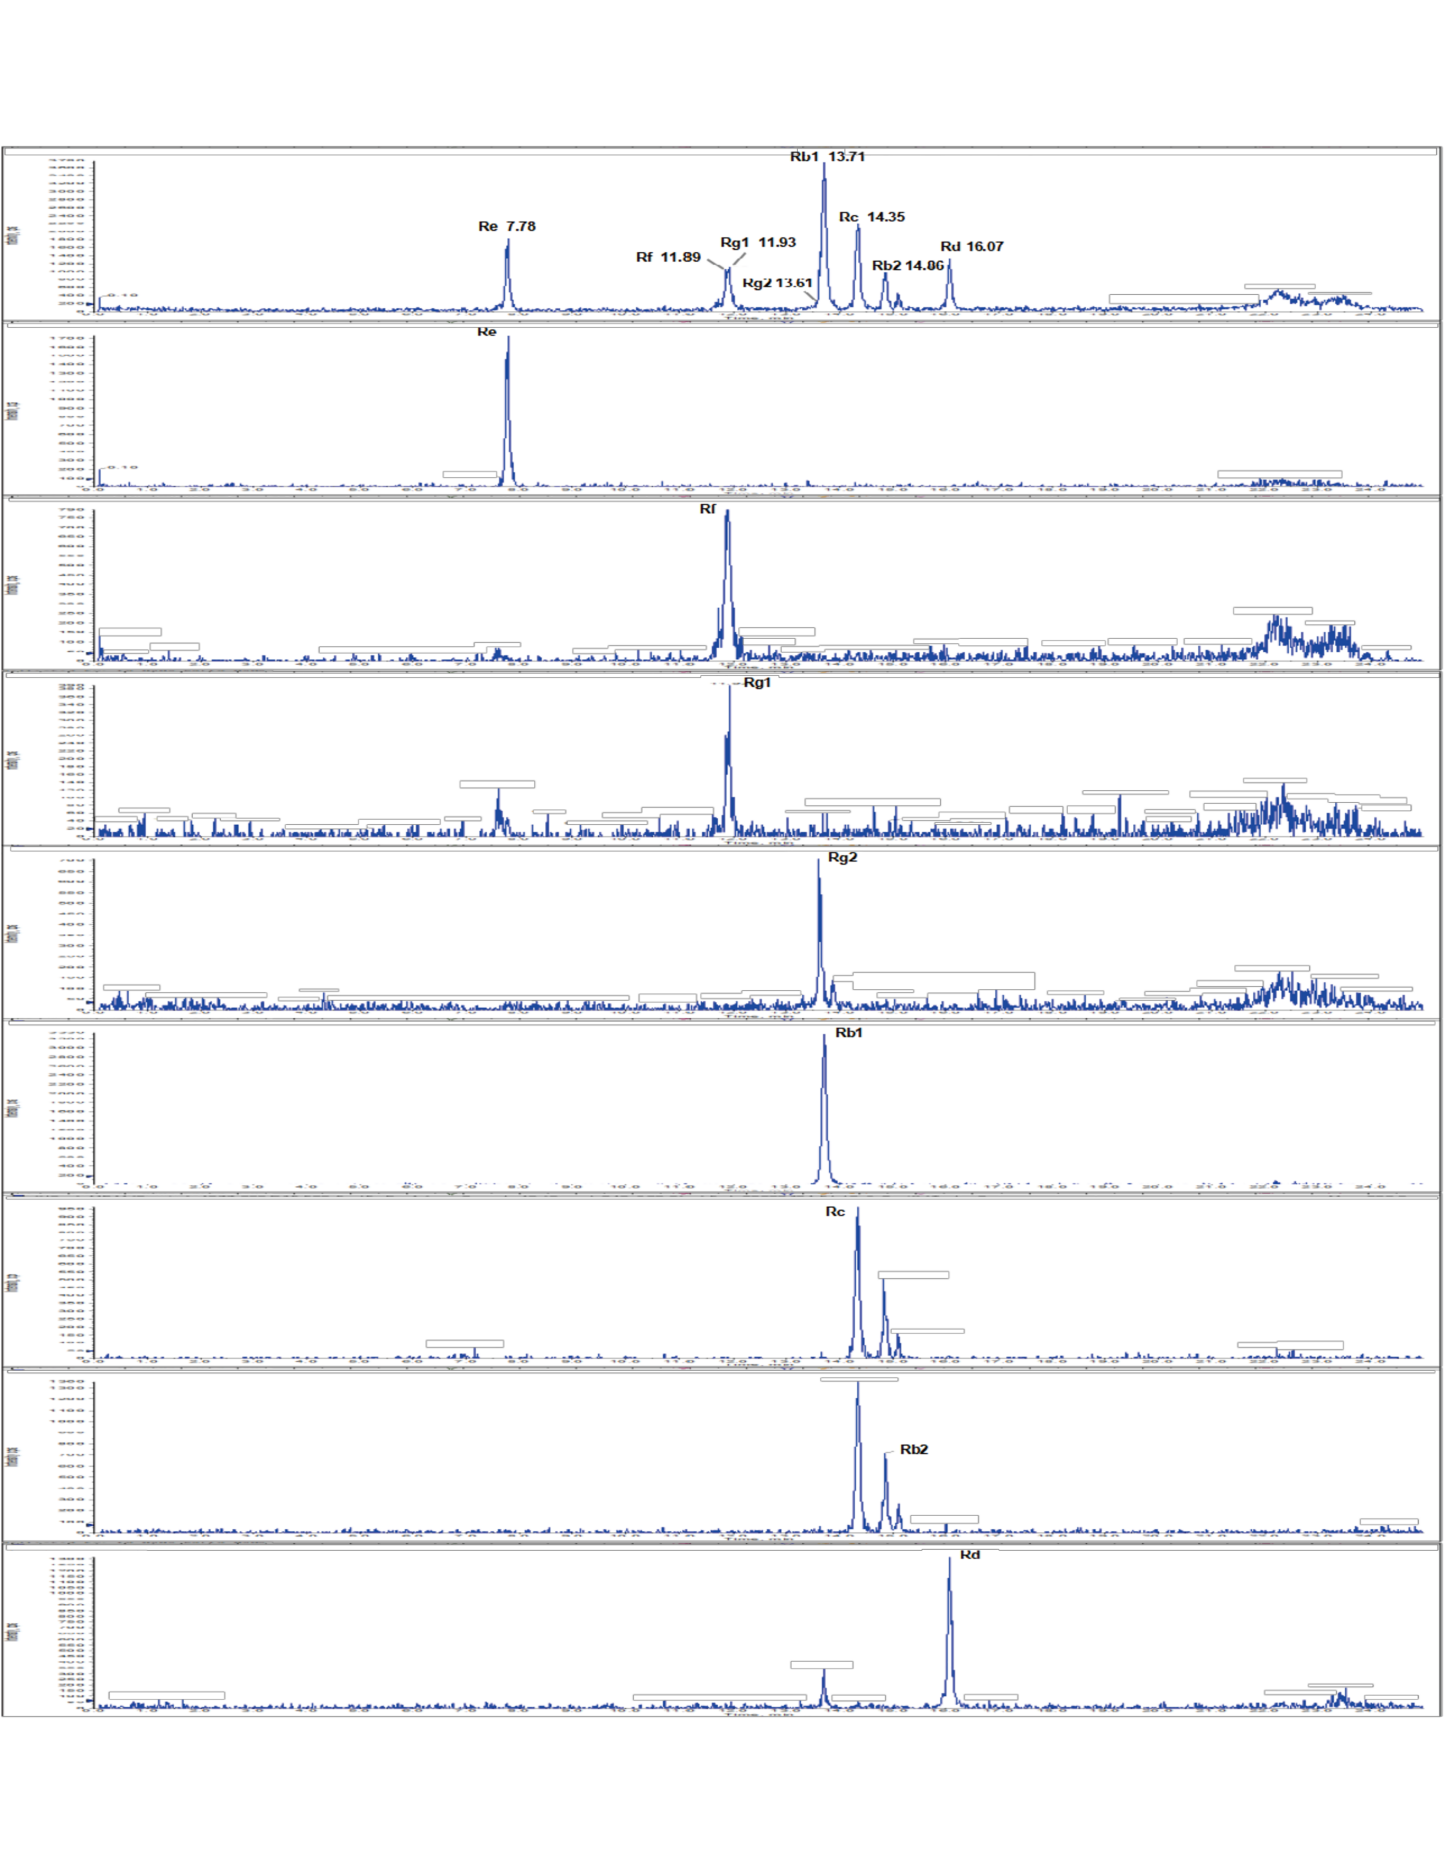


**Figure S1. The quantitative profile of GTSs based on UPLC-MS.**


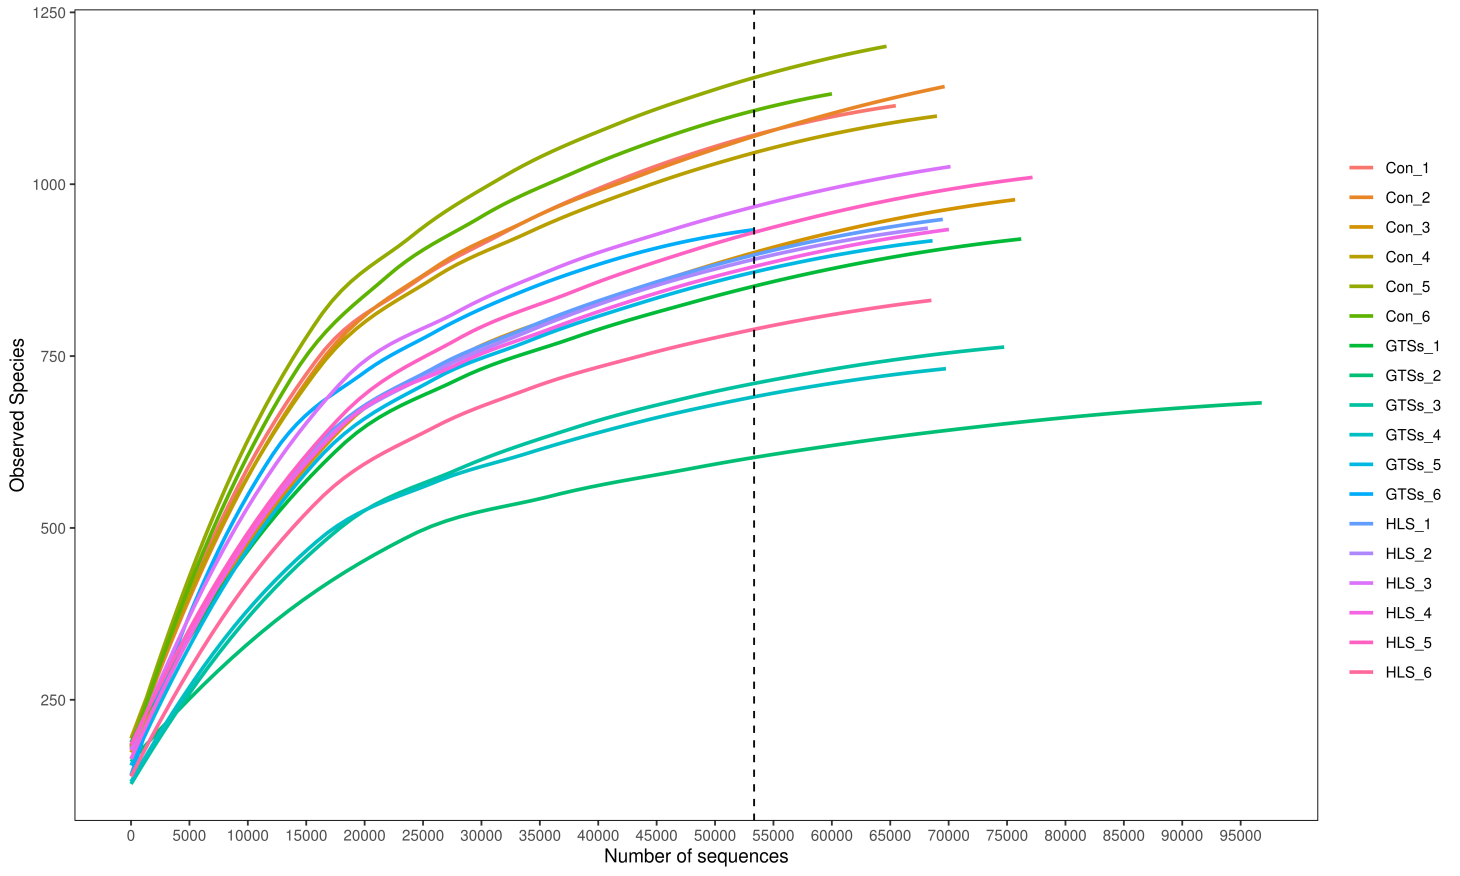


**Figure S2. The rarefaction curve of experimental samples.** When the curve flattens out as the number of extracted sequences increases in the dilutability graph, it indicated the sequencing volume of a sample was reasonable.

**Figure S3. The quantitative profile of short-chain fatty acids based on UPLC-MS.**


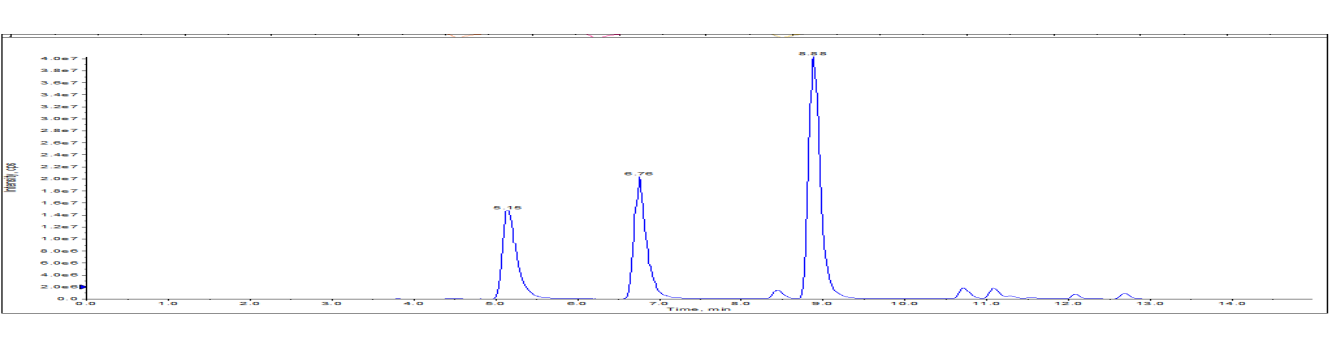

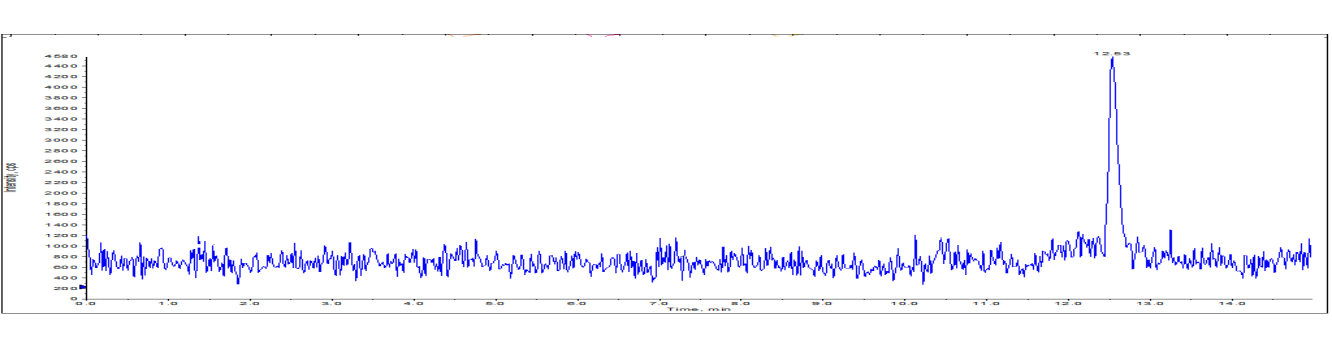

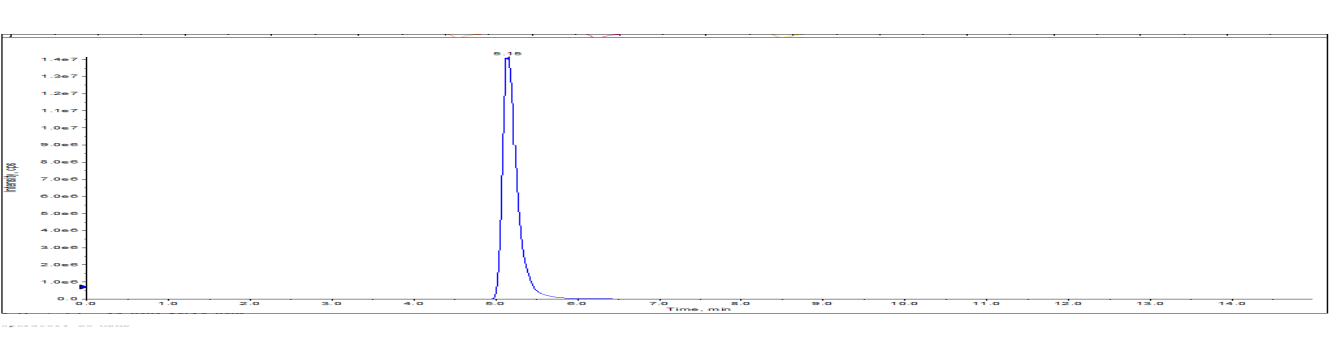

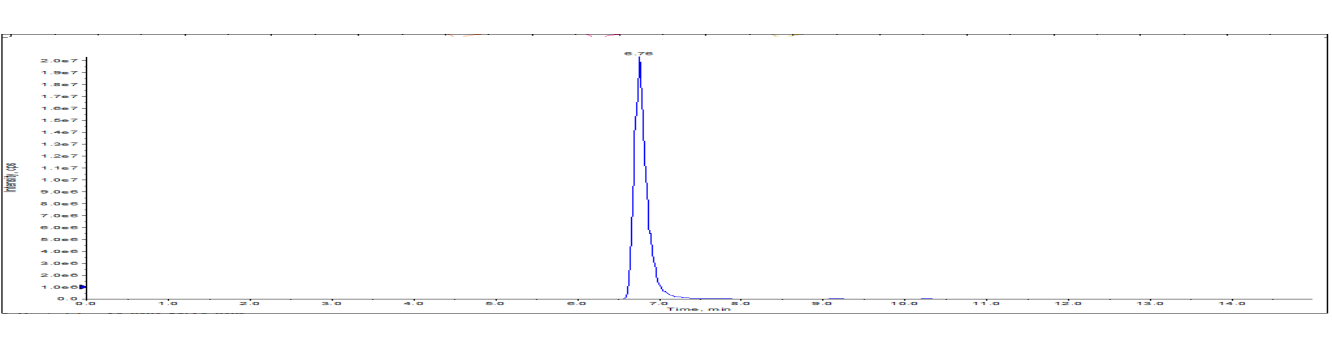

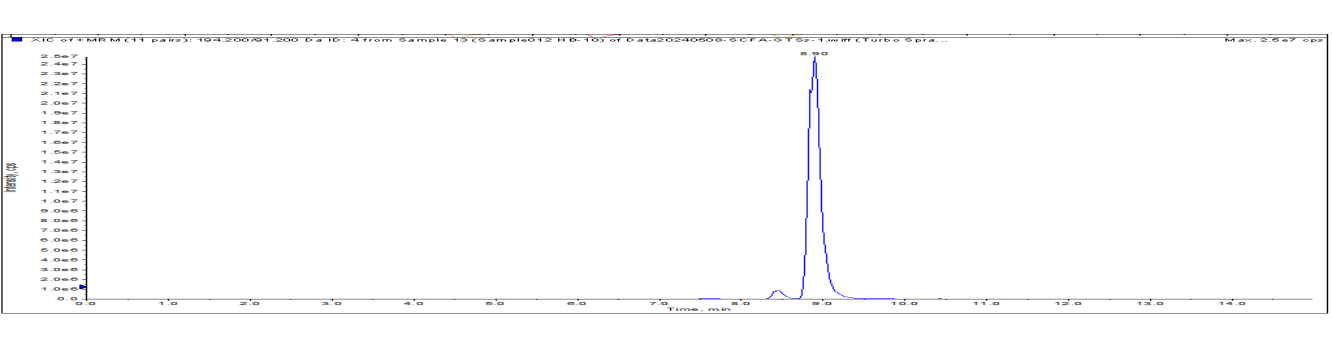

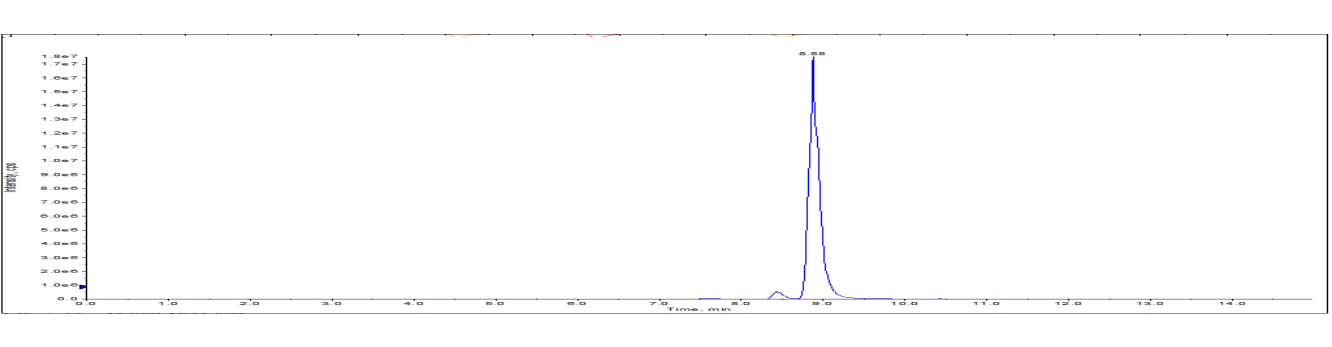


**Acetic acid 5.15**

**Propionic acid 6.76**

**Butyric acid 8.90**

**Isobutyric acid 8.88**

**IS 12.53**

**Acetic acid**

**IS**

**Propionic acid**

**Butyric acid**

**Isoutyric acid**

# Table S1. The quantitative analysis parameters of GTSs.

| **Name** | **Ploarity** | **Q1 MS (m/Z)** | **Q3 MS (m/Z)** | **DP (V)** | **CE (V)** |
| --- | --- | --- | --- | --- | --- |
| Re | ESI- | 945.5 | 637.2 | 340 | 45 |
| Rf | ESI- | 799.4 | 475.3 | 320 | 55 |
| Rg1 | ESI- | 799.5 | 637.2 | 310 | 40 |
| Rg2 | ESI- | 783.4 | 475.5 | 310 | 56 |
| Rb1 | ESI- | 1107.4 | 945.3 | 380 | 70 |
| Rc | ESI- | 1077.3 | 945.5 | 360 | 65 |
| Rb2 | ESI- | 1077.6 | 783.5 | 370 | 65 |
| Rd | ESI- | 945.7 | 621.5 | 350 | 55 |

# Table S2. RT-PCR primer sequence.

| **Gene name** | **Forward (5’-3’)** | **Reverse (5’-3’)** |
| --- | --- | --- |
| Slfn4 | TGAAAGCTTGGGGAGGACAC | CTTGGCTCGGAATCTGGGTT |
| Oas1a | CAGGGCTTCCGGACAATCTT | TCACAGGCCTGGATTTTCTGA |
| Oas2 | AGTGGTTAAGGGTGGCTCCTA | TCATGGCTTTTCAGCCGTTG |
| Ifi27l2b | ACCAGAACTACTCGCCTGCT | CACAGCCACAACTCCTCCTAT |
| Oasl2 | GCGACCGGCCTATCATTCTA | GGAGGTAGTGCGCGATAGAT |
| Isg15 | CTACAGCCATGACCTGGAACC | GCCTGATAAGGGCAACACCA |
| Oas3 | AGCTTCACGCTGACATCCAA | CGGACTTCAGCTGACCAAGA |
| Ly6e | GAGCCTTCAGCCTTTGGTGA | CCAAAGAAGCCTACTCCGGG |
| Occludin | CAACGGCAAAGTGAATGGCAAGAG | TCATCCACGGACAAGGTCAGAGG |
| Claudin-1 | CTTCTGGGTTTCATCCTGGCTTCG | CCTGAGCAGTCACGATGTTGTCC |
| TNF-α | CTCAAGCCCTGGTATGAGCC | CTCCAAAGTAGACCTGCCCG |
| IL-1β | GCAACTGTTCCTGAACTCAACT | ATCTTTTGGGGTCCGTCAACT |
| IL-6 | GTTGCCTTCTTGGGACTGATG | TACTGGTCTGTTGTGGGTGGT |
| IL-7 | AATTCCTCCCCTGATCCTTG | TTGTCCAGTTGATTGATGCTG |
| GAPDH | ATGGTGAAGGTCGGTGTGAA | TGGAAGATGGTGATGGGCTT |

# Table S3. The quantitative analysis parameters of SCFAs.

| **Name** | **Ploarity** | **Q1 MS (m/Z)** | **Q3 MS (m/Z)** | **DP (V)** | **CE (V)** |
| --- | --- | --- | --- | --- | --- |
| Acetic acid | ESI+ | 166.1 | 91.2 | 50 | 18 |
| Propionic acid | ESI+ | 180.1 | 91.2 | 68 | 20 |
| Butyric acid | ESI+ | 194.2 | 91.2 | 72 | 21 |
| Isobutyric acid | ESI+ | 194.2 | 91.1 | 89 | 20 |
| Acetic acid C-13 | ESI+ | 167.1 | 91.2 | 91 | 59 |

| **Table S4. The quality analysis of sequencing data** | | | | | |
| --- | --- | --- | --- | --- | --- |
| Sample | Clean reads | Clean bases | Q20 (%) | Q30 (%) | GC (%) |
| Con-1 | 284082 | 70026213 | 95.45 | 90.17 | 53.87 |
| Con-2 | 292438 | 71939748 | 95.25 | 89.77 | 53.29 |
| Con-3 | 289622 | 71681445 | 95.54 | 90.32 | 53.54 |
| Con-4 | 280204 | 69210388 | 95.40 | 90.02 | 53.84 |
| Con-5 | 292602 | 72126393 | 95.42 | 90.07 | 53.92 |
| Con-6 | 270212 | 66472152 | 95.17 | 89.65 | 53.52 |
| HLS-1 | 292016 | 72273960 | 95.41 | 90.03 | 53.88 |
| HLS-2 | 274114 | 67706158 | 95.40 | 90.02 | 53.79 |
| HLS-3 | 273636 | 67451274 | 95.45 | 90.12 | 53.61 |
| HLS-4 | 284550 | 69999300 | 95.03 | 89.36 | 53.52 |
| HLS-5 | 283698 | 70215255 | 95.27 | 89.86 | 53.88 |
| HLS-6 | 281616 | 69559152 | 95.34 | 89.93 | 53.96 |
| GTSs-1 | 284314 | 70083401 | 95.24 | 89.79 | 53.85 |
| GTSs-2 | 273280 | 67226880 | 94.97 | 89.28 | 52.46 |
| GTSs-3 | 292036 | 72278910 | 95.07 | 89.49 | 53.53 |
| GTSs-4 | 270478 | 66808066 | 95.23 | 89.76 | 53.33 |
| GTSs-5 | 275010 | 67789965 | 95.10 | 89.61 | 53.09 |
| GTSs-6 | 274794 | 67599324 | 95.08 | 89.49 | 53.58 |

| **Table S5. The statistical datas of bacteria with significant differences between groups** | | | | | |
| --- | --- | --- | --- | --- | --- |
| Gut Microbiome (genus level) | Relative abundance | | | Trend change | |
| Con | HLS | GTSs | HLS vs Con | GTSs vs HLS |
| *Turicibacter* | 0.012105 | 0.000383 | 0.000422 | ↓** | ↑ |
| *Anaeroplasma* | 0.000407 | 1.22E-05 | 1.79E-05 | ↓* | ↑ |
| *Anaerostipes* | 0.000235 | 2.38E-05 | 3.44E-06 | ↓* | ↓ |
| *Enterococcus* | 0.000466 | 0.000281 | 7.60E-05 | ↓ | ↓ |
| *Lactococcus* | 0.000185 | 1.92E-05 | 0.000116 | ↓* | ↑ |
| *Leptotrichia* | 7.42E-05 | 1.21E-05 | 2.19E-06 | ↓ | ↓ |
| *Pseudoalteromonas* | 4.84E-05 | 9.57E-06 | 8.75E-06 | ↓* | ↓ |
| *Haemophilus* | 2.58E-05 | 8.64E-06 | 2.19E-06 | ↓ | ↓ |
| *Anaerospora* | 2.42E-06 | 7.22E-06 | 0 | ↑ | ↓# |
| *Loktanella* | 0 | 1.20E-05 | 0 | ↑* | ↓# |
| *Veillonella* | 1.51E-05 | 2.84E-05 | 4.58E-06 | ↑ | ↓# # |
| *Collinsella* | 3.56E-05 | 0.00014 | 2.49E-05 | ↑* | ↓# |
| ***Bifidobacterium*** | **5.57E-05** | **0.000173** | **4.51E-05** | **↑*** | **↓#** |
| ***Staphylococcus*** | **2.69E-05** | **0.000271** | **7.76E-05** | **↑**** | **↓#** |
| ***Corynebacterium*** | **0.000309** | **0.00098** | **7.82E-05** | **↑*** | **↓# #** |
| *Adlercreutzia* | 0.002021 | 0.002989 | 0.001417 | ↑ | ↓# |
| *Coprococcus* | 0.006635 | 0.007902 | 0.016722 | ↑ | ↑# |
| *Bacteroides* | 0.002732 | 0.004277 | 0.001446 | ↑ | ↓# |
| ***Jeotgalicoccus*** | **0** | **0.00164** | **3.73E-05** | **↑*** | **↓#** |
| *Clostridium* | 0.007317 | 0.018253 | 0.005844 | ↑ | ↓# |
| ***Prevotella*** | **0.012598** | **0.041706** | **0.014745** | **↑**** | **↓# #** |
| *Lactobacillus* | 0.098414 | 0.164593 | 0.409591 | ↑ | ↑# # |

Note: **P* < 0.05, ***P* < 0.01, ****P* < 0.001, compared with CON group; #*P* < 0.05, ##*P* < 0.01, ###*P* < 0.001, compared with HLS group. “↑” represent increases; “↓” represents decrease. After LEfSe analysis, significant changes in the microbial community were obtained. P*revotella, Bifidobacterium, Staphylococcus, Corynebacterium and Jeotgalicoccus* were the dominant bacteria in the HLS group, and their relative abundance were significantly decreased after GTSs intervention. Specific changes in these microbiota are indicated in bold text.

实时翻译

划译

After LEfSe analysis, significant changes in the microbial community were obtained. Prevotella, Bifidobacterium, Staphylococcus, Corynebacterium, and Global Microbes were the dominant bacteria in the model group, and their relative abundance significantly decreased after GTSs intervention

| **Table S6. The Parameters for calibration curves in rat feces** | | | |
| --- | --- | --- | --- |
| **Name** | **Linear equation** | **R^2** | Linear range (**µ**M) |
| Acetic acid | y = 16.478 * x + 137.62 | 0.9987 | 0.625～320 |
| Propionic acid | y = 20.25 * x + 95.868 | 0.9985 | 0.625～320 |
| Butyric acid | y = 24.863 * x + 96.316 | 0.9981 | 0.625～320 |
| Isobutyric acid | y = 0.4222 * x + 11.585 | 0.9975 | 0.625～320 |
